# Supplementary material for: Modeling long QT syndrome type 2 on-a-chip via in-depth assessment of isogenic gene-edited 3D cardiac tissues
Source: PubMed Central journal article supplement — Sci Adv. 2022 Dec 16;8(50):eabq6720. doi: 10.1126/sciadv.abq6720 (PMC9757749; doi:10.1126/sciadv.abq6720), 2022-12-16
Supplement: sciadv.abq6720_sm.pdf [file sciadv.abq6720_sm.pdf]

Supplementary Materials for  
**Modeling long QT syndrome type 2 on a chip via in-depth assessment of  
isogenic gene-edited 3D cardiac tissues**

Jaimeson Veldhuizen *et al.*

Corresponding author: Mehdi Nikkhah, mnikkhah@asu.edu

*Sci. Adv.* **8**, eabq6720 (2022)  
DOI: 10.1126/sciadv.abq6720

**The PDF file includes:**

Figs. S1 to S3  
Tables S1 and S2  
Legends for movies S1 to S6  
Legend for supplemental source code

**Other Supplementary Material for this manuscript includes the following:**

Movies S1 to S6  
Supplemental source code

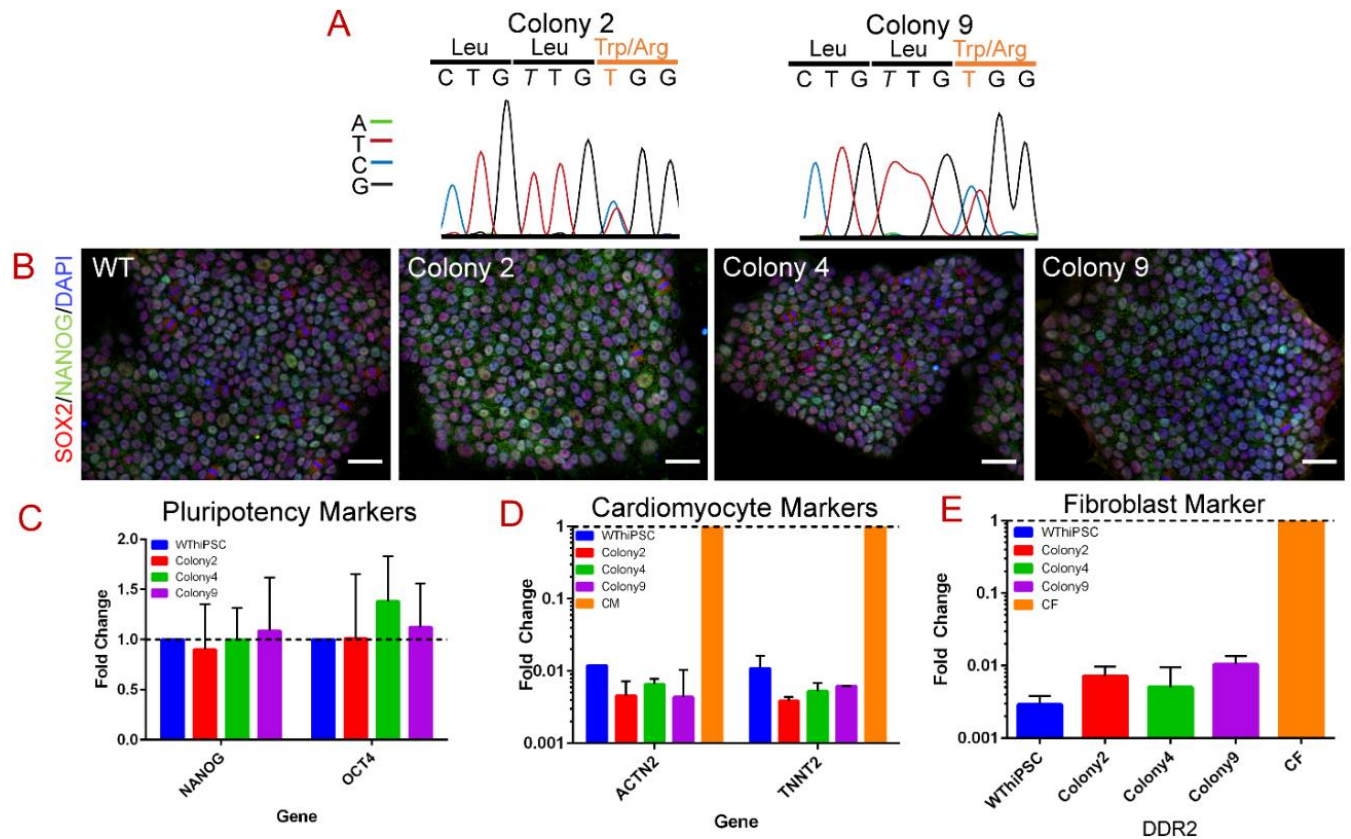

**Fig. S1.**

Characterization of hiPSC clones with R531W edit in *KCNH2*. (A) Trace files of the target site in Colony 2 and Colony 9, showing a heterozygous edit in c.C1591T. (B) Immunostaining of pluripotency markers, where SOX2=red and NANOG=green, for all edited colonies and WT hiPSCs. Gene expression analysis of (C) pluripotency, (D) cardiomyocyte, and (E) fibroblast markers of edited colonies, normalized to the respective positive control.

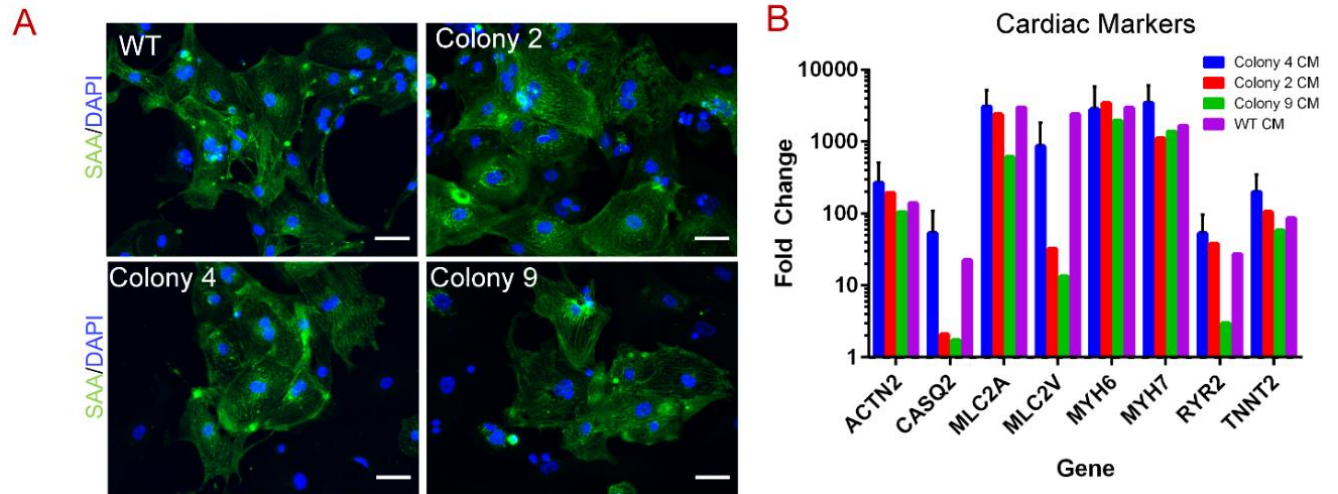

**Fig. S2.**

Cardiomyocyte differentiation potential of hiPSC clones with R531W edit in *KCNH2*. (A) Immunostaining of sarcomeric  $\alpha$ -actinin and (B) gene expression analysis of an array of cardiac markers of cardiomyocytes differentiated from edited colonies and WT hiPSCs.

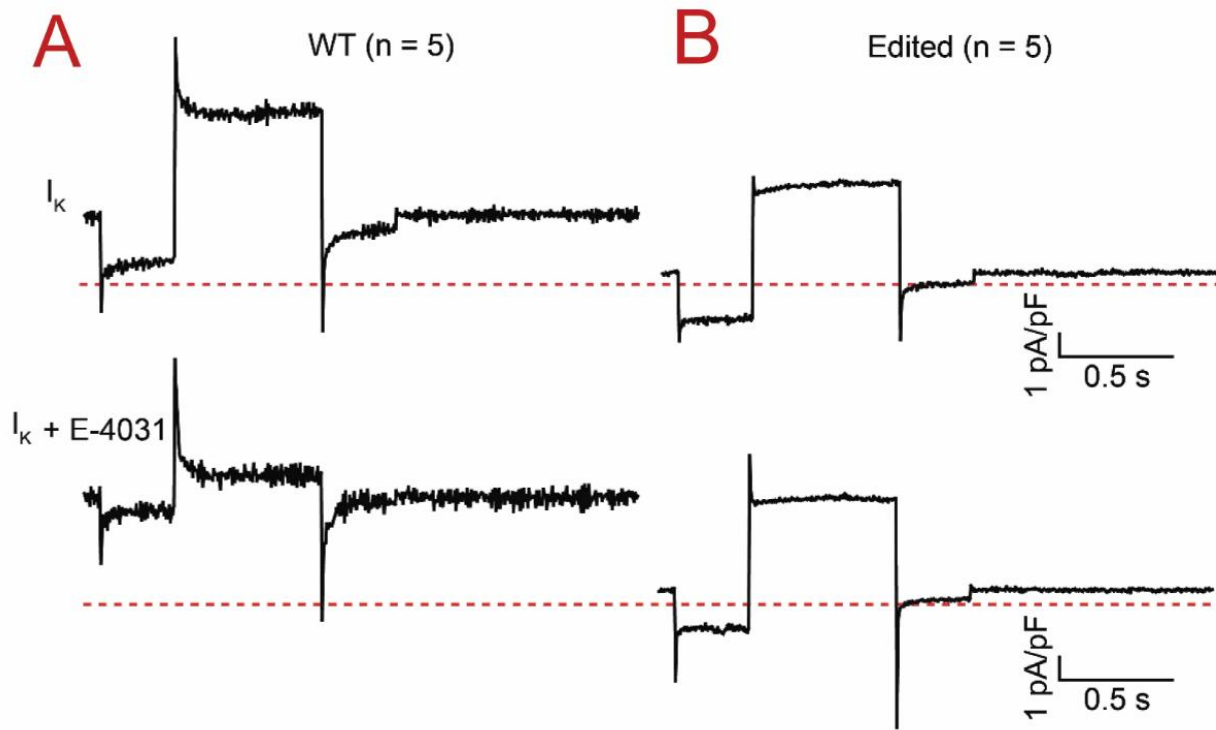

**Fig. S3.**

Whole-cell patch-clamp experiments on WT and edited hiPSC-CMs  $I_K$  currents of (A, top) WT and (B, top) edited CMs were collected using extracellular solution supplemented with JNJ-303 (1  $\mu$ M) and Nifedipine (5  $\mu$ M).  $I_K$  + E-4031 currents of (A, bottom) WT and (B, bottom) edited CMs were collected after perfusion of E-4031 (1  $\mu$ M). The data are average traces from n=5 cells.

| HEK293 Transfection |             |             |
|---------------------|-------------|-------------|
|                     | Bystander C | Target C    |
| US                  | 32.5+/-0.71 | 0.5+/-0.71  |
| DN                  | 18.5+/-2.12 | 2.5+/-0.71  |
| BFP                 | 41 +/-7.07  | 5.5+/-2.12  |
| BFP/GFP             | 72.5+/-2.38 | 6.15+/-2.06 |

| hiPSC Transfection |               |            |
|--------------------|---------------|------------|
|                    | Bystander C   | Target C   |
| US                 | 11.5+/-6.24   | 1+/-0.82   |
| DN                 | 14.25+/-4.86  | 2+/-0      |
| BFP                | 50.25+/-14.17 | 2.5+/-0.58 |
| BFP/GFP            | 66.25+/-4.86  | 4.5+/-2.08 |

**Table S1.**  
Editing efficiencies of both HEK and hiPSC transfections

| <b>Gene</b>     | <b>Forward primer</b> | <b>Reverse primer</b> | <b>Product size (bp)</b> |
|-----------------|-----------------------|-----------------------|--------------------------|
| <i>DSCR3</i>    | CACTAACGGGAGAGCTGGTG  | AACCATGGAACGTGAGGGTG  | 153                      |
| <i>KIAA1324</i> | AAAATAACCCCTGGCCCGAA  | TAGCGTTGTCCTGAGTGAGC  | 457                      |
| <i>TFR2</i>     | TGACGTCTACTGCCCTACA   | ACTTACCTTCTGGGCGAAGC  | 274                      |
| <i>POU3F3</i>   | AGAGTCTGCTCTACTCGCA   | CAGCTCTGGCGTGTCCC     | 149                      |
| <i>ACTN2</i>    | GGCACCCAGATTGAGAACAT  | CCTGAATAGCAAAGCGAAGG  | 268                      |
| <i>CASQ2</i>    | GTTGCCCGGGACAATACTGA  | CTGTGACATTACACCACCCA  | 142                      |
| <i>MLC2A</i>    | CAGCGGCAAAGGGGTGGTGAA | GGTCCATGGGTGTCAGGGCGA | 113                      |
| <i>MLC2V</i>    | GGCGCCAACCTCCAACGTGTT | ACGTTCACTCGCCCAAGGGC  | 149                      |
| <i>MYH6 - 4</i> | TCCTGCGGCCAGATTCTTC   | TCTTCCTTGTCATCGGGCAC  | 193                      |
| <i>MYH</i>      | CACAGCCATGGGAGATTCCGG | CAGGCACGAAGACATCCTTCT | 128                      |
| <i>RYR2</i>     | AGCCAGTGTCATCCACCAAC  | ACTGATCACAGGTGGCTGAA  | 89                       |
| <i>TNNT2</i>    | GACAGAGCGGAAAAGTGGGA  | CTCCTTGGCCTTCTCCCTCA  | 127                      |
| <i>18S</i>      | GTAACCCGTTGAACCCATT   | CCATCCAATCGGTAGTAGCG  | 151                      |
| <i>COL1A1</i>   | AGTGGTTTGGATGGTGCCAA  | GCACCATCATTTCCACGAGC  | 170                      |
| <i>COL3A1</i>   | CCAGGAGCTAACGGTCTCAG  | CAGGGTTTCCATCTCTTCCA  | 103                      |
| <i>TIMP1</i>    | AATTCCGACCTCGTCATCAG  | TGCAGTTTTCCAGCAATGAG  | 230                      |
| <i>KCNH2</i>    | GAATGTGCCCTTCCCTGTC   | ATGCAGGCTAGCCAGTGC    | 146                      |
| <i>DDR2</i>     | TTTTTGGGTGGGGAAACGC   | CTGGGAGGCATATCAACGGG  | 249                      |
| <i>POSTN</i>    | CCCCGTGACTGTCTATAAGC  | CCTTGGTGACCTCTTCTTGTA | 197                      |
| <i>OCT4</i>     | CAAAGCAGAAACCCTCGTGC  | CTCGGACCACATCCTTCTCG  | 164                      |
| <i>NANOG</i>    | CAATGGTGTGACGCAGGGAT  | GGACTGTTCCAGGCCTGATT  | 183                      |

**Table S2.**

Primer sequences utilized in either PCR or qPCR

**Movie S1.**

Phase contrast video of WT tissue on-a-chip after 14 days of culture within microfluidic device.

**Movie S2.**

Phase contrast video of LQTS2 tissue on-a-chip after 14 days of culture within microfluidic device.

**Movie S3.**

Calcium transients of control WT tissues on-a-chip before epinephrine.

**Movie S4.**

Calcium transients of control LQTS2 tissues on-a-chip before epinephrine.

**Movie S5.**

Calcium transients of control WT tissues on-a-chip after epinephrine.

**Movie S6.**

Calcium transients of control LQTS2 tissues on-a-chip after epinephrine.

**Supplemental source code**

Generated code to quantify action potential metrics from calcium transients.
